# Supplementary material
Source: PubMed Central journal article supplement (PMC7017387)
Supplement: NIHMS1045224-supplement-DNA_analysis.pdf [file NIHMS1045224-supplement-DNA_analysis.pdf]

## Short Tandem Repeat (STR) DNA analysis

| Cell line | TRNDi003-A |
|-----------|------------|
| D5S818    | 11, 12     |
| D13S317   | 11, 12     |
| D7S820    | 10, 10     |
| D16S539   | 9, 11      |
| vWA       | 15, 18     |
| TH01      | 7, 8       |
| AMEL      | X, X       |
| TPOX      | 8, 11      |
| CSF1PO    | 11, 11     |
| D18S51    | 16, 19     |
| D21S11    | 28, 33.2   |
| D3S1358   | 15, 17     |
| D8S1179   | 12, 14     |
| FGA       | 23, 25     |
| Penta D   | 12, 12     |
| Penta E   | 17, 18     |
