# Supplementary material
Source: PubMed Central journal article supplement (PMC7017387)
Supplement: NIHMS1045224-supplement-Suppl.pdf [file NIHMS1045224-supplement-Suppl.pdf]

## Supplementary Fig. S1

|                  | Negative control     | Positive control           | iPS TRNDi003-A       |
|------------------|----------------------|----------------------------|----------------------|
| <b>Read A</b>    | 4.06<br>4.03<br>4.12 | 3.23<br>2.93<br>2.48       | 1.70<br>1.64<br>1.48 |
| <b>Read B</b>    | 0.49<br>0.45<br>0.25 | 208.29<br>216.80<br>207.76 | 0.35<br>0.28<br>0.20 |
| <b>Ratio B/A</b> | 0.10 ± 0.03          | 74.12 ± 9.66               | 0.38 ± 0.22          |
